# Supplementary material for: Association of Interstitial Cystitis/Bladder Pain Syndrome with Stress-Related Diseases: A Nationwide Population-Based Study
Source: MDPI journal article supplement (doi:10.3390/jcm10235669), 2021-11-30
Supplement: s1 [file s1]

## Supplementary Materials:

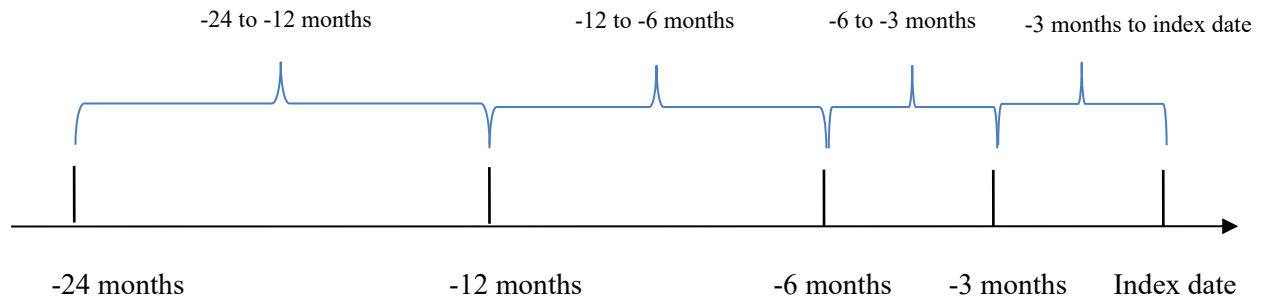

**Figure S1.** Time period of the stress related disease before the diagnosis of IC/BPS (index date).

**Table S1.** ICD-9 diagnostic codes of 33 autoimmune diseases

| Autoimmune Diseases          | ICD-9-CM Codes    |
|------------------------------|-------------------|
| Graves' disease              | 242,242.01        |
| Psoriasis                    | 696, 696.1, 696.8 |
| Systemic lupus erythematosus | 710.0             |
| Rheumatoid arthritis         | 714               |
| Ankylosing spondylitis       | 720.0             |
| Guillain–Barre's syndrome    | 357.0             |
| Sjogren's syndrome           | 710.2             |
| Myasthenia gravis            | 358.0             |
| Pernicious anemia            | 281.0             |
| Hereditary hemolytic anemia  | 282               |
| Polyarteritis nodosa         | 446               |
| Celiac disease               | 579.0             |
| Uveitis                      | 364.00, 364.01    |
| Polymyalgia rheumatica       | 725               |
| Dermatomyositis              | 710.3             |
| Hashimoto's thyroiditis      | 245.2             |
| Hypersensitivity vasculitis  | 446.2, 446.29     |
| Behcet's disease             | 136.1             |
| Polymyositis                 | 710.4             |
| Alopecia areata              | 704.01            |

|                               |                |
|-------------------------------|----------------|
| Autoimmune hemolytic anemia   | 283.0          |
| Multiple sclerosis            | 340            |
| Systemic sclerosis            | 710.1          |
| Juvenile rheumatoid arthritis | 714.30, 714.33 |
| Goodpasture syndrome          | 446.21         |
| Giant cell arteritis          | 446.5          |
| Thromboangitis obliterans     | 443.1          |
| Arteritis obliterans          | 446.7          |
| Kawasaki disease              | 446.1          |

**Table S2.** ICD-9 diagnostic codes of sleep disorders

| sleep disorders                       | ICD-9-CM Codes |
|---------------------------------------|----------------|
| Alcohol induced sleep disorders       | 291.82         |
| Drug induced sleep disorders          | 292.85         |
| Nonorganic Sleep Disorder Unspecified | 307.4          |
| Organic sleep disorders               | 327            |
| Restless Leg Syndrome                 | 333.94         |
| Cataplexy and narcolepsy              | 347            |
| Unspecified sleep disturbance         | 780.5          |
| Lack of adequate sleep                | V69.4          |

**Table S3.** The repeat diagnosis of SRDs and odd ratio of the diagnosis of IC/BPS

|              | SRD visit at                             |                  |                 |                    |                              |
|--------------|------------------------------------------|------------------|-----------------|--------------------|------------------------------|
| Type of SRD  | -24 to -12 months                        | -12 to -6 months | -6 to -3 months | -3 months to index | Adjusted odds ratio (95% CI) |
| UTI          |                                          |                  |                 |                    |                              |
|              | N                                        | N                | N               | N                  | Reference                    |
|              | Y (Ever diagnosed from -24 to -3 months) |                  |                 | N                  | 5.33(4.33 to 6.56)           |
|              | N                                        | N                | N               | Y                  | 18.27(13.01 to 25.65)        |
|              | Y (Ever diagnosed from -24 to -3 months) |                  |                 | Y                  | 50.17(36.95 to 68.13)        |
|              | N                                        | N                | Y               | Y                  | 45.61(19.82 to 104.96)       |
|              | N                                        | Y                | Y               | Y                  | 72.94(28.93 to 183.92)       |
|              | Y                                        | Y                | Y               | Y                  | 101.93(55.52 to 187.14)      |
| Peptic ulcer |                                          |                  |                 |                    |                              |
|              | N                                        | N                | N               | N                  | Reference                    |
|              | Y (Ever diagnosed from -24 to -3 months) |                  |                 | N                  | 2.70(2.25 to 3.24)           |
|              | N                                        | N                | N               | Y                  | 5.93(3.80 to 9.23)           |
|              | Y (Ever diagnosed from -24 to -3 months) |                  |                 | Y                  | 3.62(2.72 to 4.83)           |
|              | N                                        | N                | Y               | Y                  | 2.36(1.11 to 5.01)           |
|              | N                                        | Y                | Y               | Y                  | 3.82(1.66 to 8.80)           |
|              | Y                                        | Y                | Y               | Y                  | 3.22(2.06 to 5.06)           |
| IBS          |                                          |                  |                 |                    |                              |
|              | N                                        | N                | N               | N                  | Reference                    |
|              | Y (Ever diagnosed from -24 to -3 months) |                  |                 | N                  | 3.63(2.75 to 4.81)           |

|                   |                                          |   |   |   |                     |
|-------------------|------------------------------------------|---|---|---|---------------------|
|                   | N                                        | N | N | Y | 5.44(2.75 to 10.73) |
|                   | Y (Ever diagnosed from -24 to -3 months) |   |   | Y | 4.75(2.72 to 8.29)  |
|                   | N                                        | N | Y | Y | 3.49(1.06 to 11.45) |
|                   | N                                        | Y | Y | Y | 9.56(2.37 to 38.64) |
|                   | Y                                        | Y | Y | Y | 4.21(1.21 to 14.58) |
| Depression        |                                          |   |   |   |                     |
|                   | N                                        | N | N | N | Reference           |
|                   | Y (Ever diagnosed from -24 to -3 months) |   |   | N | 2.21(1.81 to 2.69)  |
|                   | N                                        | N | N | Y | 7.22(4.37 to 11.95) |
|                   | Y (Ever diagnosed from -24 to -3 months) |   |   | Y | 3.79(3.00 to 4.79)  |
|                   | N                                        | N | Y | Y | 3.01(1.26 to 7.20)  |
|                   | N                                        | Y | Y | Y | 5.59(2.98 to 10.49) |
|                   | Y                                        | Y | Y | Y | 3.24(2.38 to 4.40)  |
| Sleep disorders   |                                          |   |   |   |                     |
|                   | N                                        | N | N | N | Reference           |
|                   | Y (Ever diagnosed from -24 to -3 months) |   |   | N | 2.29(1.91 to 2.73)  |
|                   | N                                        | N | N | Y | 3.57(2.40 to 5.32)  |
|                   | Y (Ever diagnosed from -24 to -3 months) |   |   | Y | 2.96(2.33 to 3.77)  |
|                   | N                                        | N | Y | Y | 2.44(1.22 to 4.88)  |
|                   | N                                        | Y | Y | Y | 1.67(0.75 to 3.73)  |
|                   | Y                                        | Y | Y | Y | 2.95(2.10 to 4.15)  |
| Allergic rhinitis |                                          |   |   |   |                     |

|  |                                          |   |   |   |                     |
|--|------------------------------------------|---|---|---|---------------------|
|  | N                                        | N | N | N | Reference           |
|  | Y (Ever diagnosed from -24 to -3 months) |   |   | N | 1.73(1.42 to 2.10)  |
|  | N                                        | N | N | Y | 2.10(1.23 to 3.57)  |
|  | Y (Ever diagnosed from -24 to -3 months) |   |   | Y | 2.08(1.41 to 3.07)  |
|  | N                                        | N | Y | Y | 5.77(2.00 to 16.67) |
|  | N                                        | Y | Y | Y | 1.42(0.52 to 3.88)  |
|  | Y                                        | Y | Y | Y | 1.50(0.70 to 3.23)  |

**Table S4.** morbidities of autoimmune disease among study groups

| Variables                                                                 | Control   | IC/BPS     | Univariate<br>OR (95% C.I.) | p      |
|---------------------------------------------------------------------------|-----------|------------|-----------------------------|--------|
| n                                                                         | 4412      | 1103       |                             |        |
| Co-morbidities (within 2 year before<br>index date) of autoimmune disease | 318(7.2%) | 128(11.6%) | 1.69(1.36 to 2.11)          | <0.001 |
| Crohn's disease                                                           | 60(1.4%)  | 28(2.5%)   | 1.88(1.20 to 2.96)          | 0.006  |
| Sjogren syndrome                                                          | 46(1.0%)  | 31(2.8%)   | 2.72(1.72 to 4.30)          | <0.001 |
| Rheumatoid arthritis                                                      | 56(1.3%)  | 16(1.5%)   | 1.15(0.65 to 2.00)          | 0.635  |
| Graves' disease                                                           | 25(0.6%)  | 8(0.7%)    | 1.28(0.58 to 2.84)          | 0.543  |
| Ankylosing spondylitis                                                    | 16(0.4%)  | 6(0.5%)    | 1.53(0.58 to 4.04)          | 0.386  |
| Systemic lupus erythematosus                                              | 9(0.2%)   | 6(0.5%)    | 2.67(0.95 to 7.49)          | 0.063  |
| Hereditary hemolytic anemia                                               | 10(0.2%)  | 4(0.4%)    | 1.60(0.50 to 5.10)          | 0.427  |
| Hashimoto's thyroiditis                                                   | 7(0.2%)   | 5(0.5%)    | 2.86(0.91 to 9.00)          | 0.073  |
| Uveitis                                                                   | 10(0.2%)  | 2(0.2%)    | 0.80(0.18 to 3.65)          | 0.773  |
| Alopecia areata                                                           | 8(0.2%)   | 2(0.2%)    | 1.00(0.21 to 4.71)          | 1.000  |
| Polymyalgia rheumatica                                                    | 9(0.2%)   | 0(0.0%)    | -                           | -      |
| Ulcerative colitis                                                        | 3(0.1%)   | 5(0.5%)    | 6.67(1.59 to 27.90)         | 0.009  |
| Polyarteritis nodosa                                                      | 4(0.1%)   | 0(0.0%)    | -                           | -      |

The rare autoimmune diseases were not listed, because of the poor statistical power.
